# Supplementary material for: mTOR Driven Gene Transcription Is Required for Cholesterol Production in Neurons of the Developing Cerebral Cortex
Source: MDPI journal article supplement (doi:10.3390/ijms22116034), 2021-06-03
Supplement: s1 [file s1]

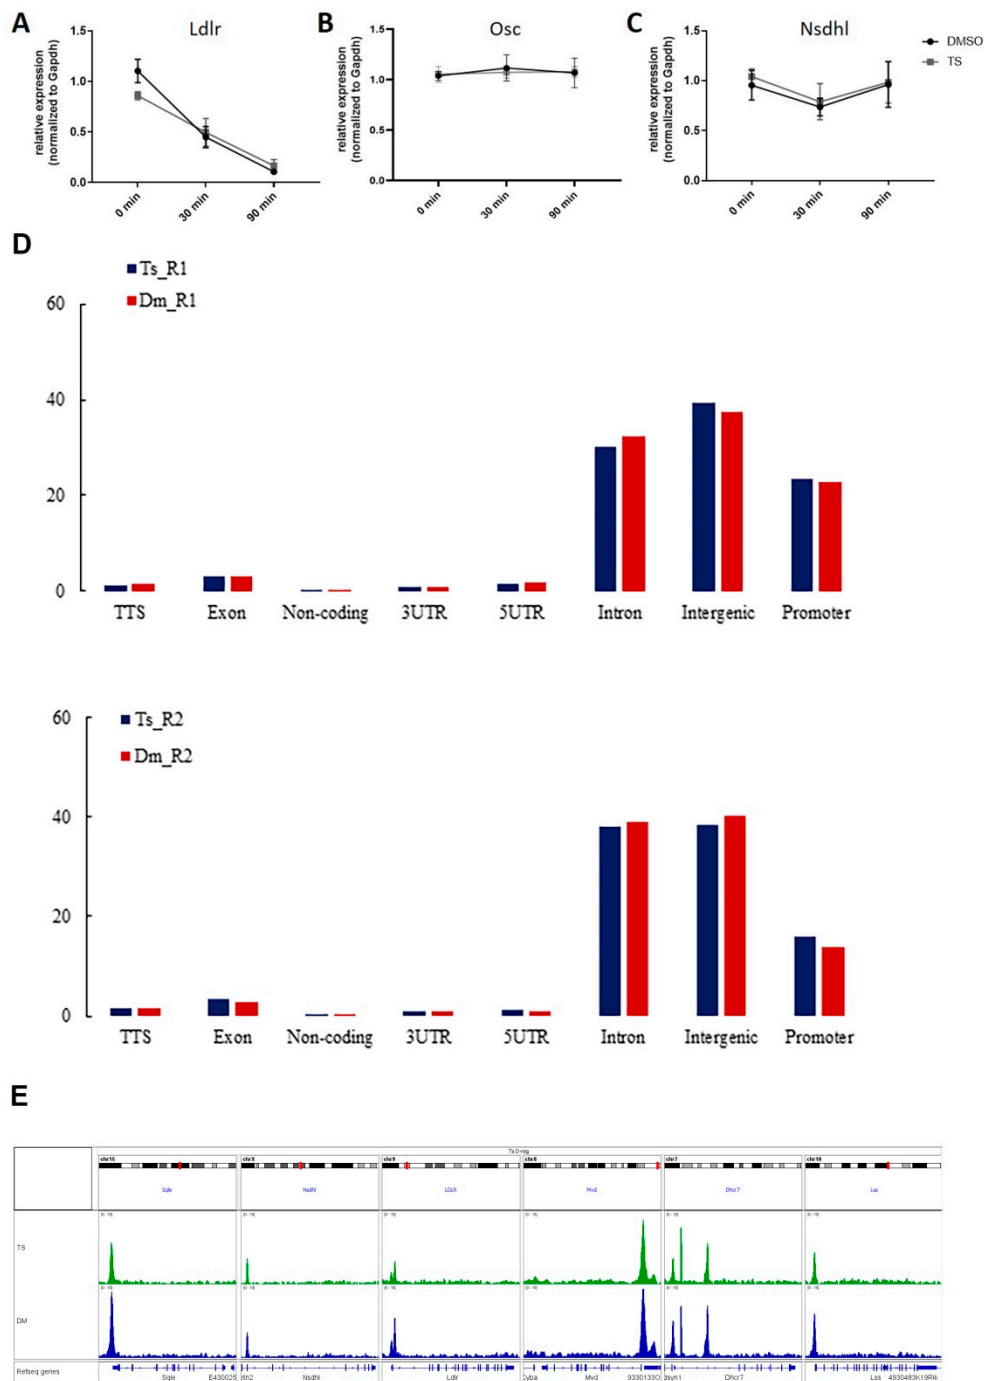

**Fig. S1: Temozolomide treatment does not influence RNA stability or chromatin accessibility in neurons.** (A-C) Primary cortical neurons were treated with DMSO or temozolomide (10  $\mu$ M) in combination with 5  $\mu$ g/ml actinomycin D for the indicated times. After cell lysis total RNA was extracted and subjected to RT-qPCR experiments to detect the abundance of *Ldlr*, *Osc* and *Nsdhl*; mRNA expression was normalized to *Gapdh*. Data represent the average of three biological replicates. (D-E) ATAC-Seq experiments. Primary cortical neurons were treated with DMSO or Temozolomide (10  $\mu$ M) for 5 hours followed by cell lysis and ATAC-Seq. (D) Peak distribution of the

two biological replicates of the ATAC-Seq experiments. (E) Representative pictures of ATAC-Seq peaks in the promoters of cholesterol biosynthesis genes.

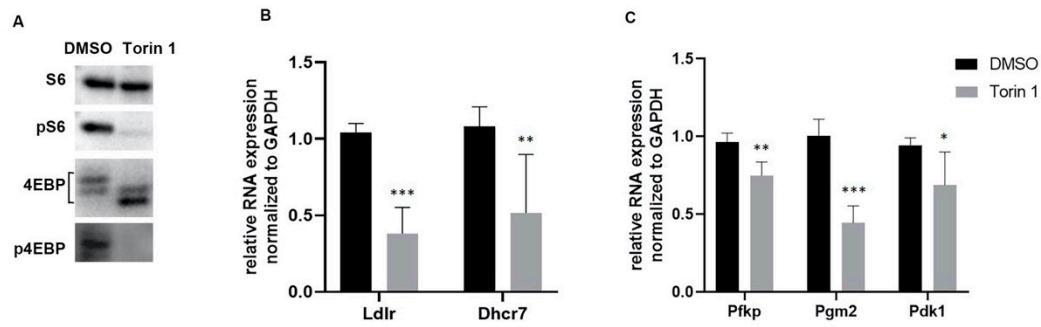

**Fig. S2: Torin 1 treatment downregulates expression of cholesterol and glycolysis genes in primary neurons.** Primary cortical neurons at DIV6 were treated with Torin 1 (500 nM) or DMSO for 5 hours. (A) Proteins were extracted and westernblot experiments were performed with antibodies detecting S6, pS6, 4EBP and p4EBP. (B, C) Total RNA was extracted and RT-qPCR experiments were performed to detect the abundance of the cholesterol biosynthesis genes *Ldlr* and *Dhcr7* (B) and the glycolysis genes *Pfkfb*, *Pgm2* and *Pdk1* (C); mRNA expression was normalized to *Gapdh*. Data represent the average of three biological replicates. For statistical analyses, student's t test was used. \* $P < 0.05$ ; \*\* $P < 0.01$ ; \*\*\* $P < 0.001$ .

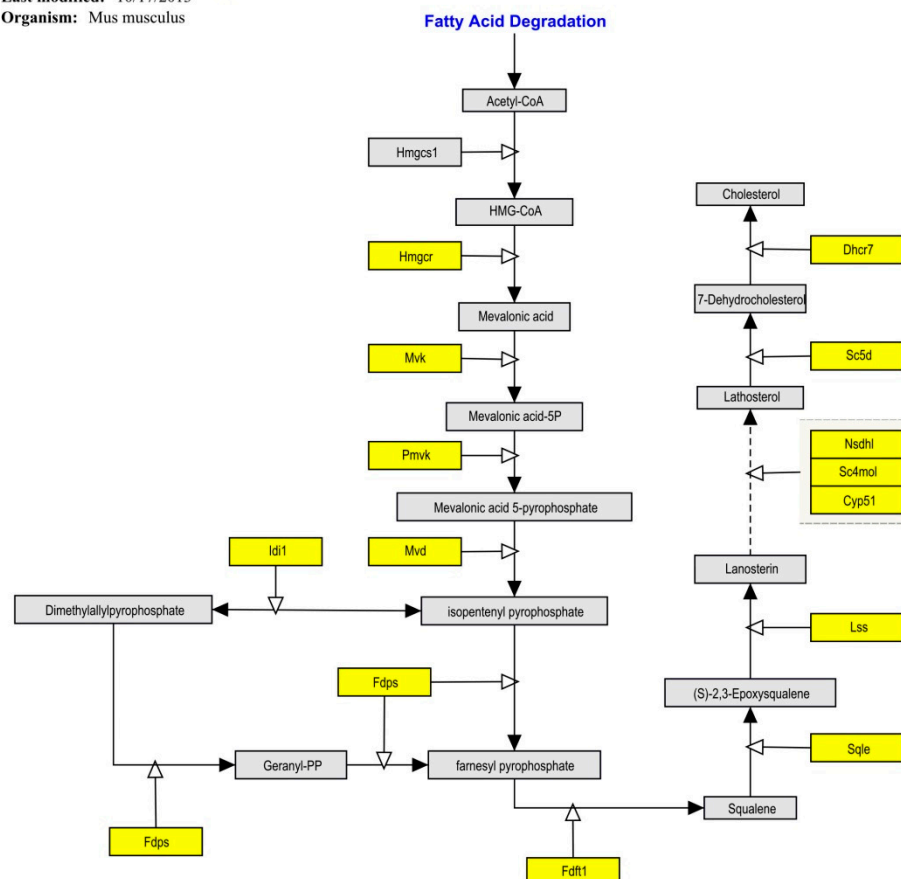

**Fig. S3: Temsirolimus treatment reduces cholesterol levels in primary neurons.** Schematic overview of the cholesterol synthesis pathway in the mouse. Genes identified as being downregulated in the RNA-Seq experiment after temsirolimus treatment for 24 hours are marked in yellow.

| Primer   | Sequence (5'-3')           |
|----------|----------------------------|
| Sqle_F   | catgagtctccggaagcag        |
| Sqle_R   | tgaagcacaacaccttctataaactt |
| Dhcr7_F  | ccagcagaatggctgttct        |
| Dhcr7_R  | aatagatggtgggctccaag       |
| Dhcr24_F | ggtcacgacggacgacgta        |
| Dhcr24_R | agggcttgtagtaactgccaat     |
| Nsdhl_F  | cgccatgaagcctattgacta      |
| Nsdhl_R  | ttaggtcgttgatcc            |
| Lss_F    | ggggcatacctaccaagatg       |

|         |                         |
|---------|-------------------------|
| Lss_R   | ccgctgttcacatgattcaa    |
| Acss2_F | gcctgcaatcctgaatgagt    |
| Acss2_R | cagggctgcttgacacc       |
| Ldlr_F  | agaggggtgaactggtgtga    |
| Ldlr_R  | caggtactggcaaccacat     |
| Mvd_F   | ctgaatggtcgcgaggag      |
| Mvd_R   | gagtgtccccgtcctctgt     |
| Pfkl_F  | gagggaccccatctgcat      |
| Pfkl_R  | gtagcttcagcaaggcaat     |
| Pgm2_F  | gcgactggaccaggagac      |
| Pgm2_R  | gctgtttcactgactcagaggta |
| Pdk1_F  | gttgaaacgtcccgtgct      |
| Pdk1_R  | gcgtgatatgggcaatcc      |
| Gapdh_F | gggttcctataaatacggactgc |
| Gapdh_R | tacggccaaatccgttcaca    |

**Table S1: Primer sequences**
